# Supplementary material for: Environmental Status Assessment Using DNA Metabarcoding: Towards a Genetics Based Marine Biotic Index (gAMBI)
Source: PubMed Central journal article supplement (PMC3946187; doi:10.1371/journal.pone.0090529), 2014-03-06
Supplement: pone.0090529.s003.pdf [file pone.0090529.s003.pdf]

Table S1. Primer pairs tested for CO1 and 18S rRNA sequences available in public databases.

| Primer pair         | 5' – 3' Forward primer sequence   | 5' – 3' Reverse primer sequence | Reference |
|---------------------|-----------------------------------|---------------------------------|-----------|
| <b>CO1</b>          |                                   |                                 |           |
| LCO1490 × HC02198   | GGTCAACAAATCATAAAGATATTGG         | TAAACTTCAGGGTGACCAAAAAATCA      | [1]       |
| dgLCO × dgHCO       | GGTCAACAAATCATAAAGAYATYGG         | TAAACTTCAGGGTGACCAARAAYCA       | [2]       |
| lgLCO × jgHCO       | TITCIACIAAYCAYAARGAYATTGG         | TAIACYTCIGGRTGICCRAARAAYCA      | [3]       |
| LCO1490 × mlCO1intR | See above                         | GGRGGRTASACSGTTCASCCSGTSCC      | [4]       |
| dgLCO × mlCO1intR   | See above                         | See above                       | [4]       |
| lgLCO × mlCO1intR   | See above                         | See above                       | [4]       |
| mlCO1intF × HC02198 | GGWACWGGWTGAACWGTWTAAYCCYCC       | See above                       | [4]       |
| mlCO1intF × dgHCO   | See above                         | See above                       | [4]       |
| mlCO1intF × jgHCO   | See above                         | See above                       | [4]       |
| UniF × UniR         | CAAAATCATAATGAAGGCATGAGC          | TCCACTAATACAARGATATTGGTAC       | [5]       |
| CrustDF1 × CrustDR1 | GGTCWACAAAYCATAAAGAYATTGG         | TAAACYTCAGGRTGACCRAARAAYCA      | [6]       |
| CrustF1 × HC02198   | TTTTCTACAAATCATAAAGACATTGG        | See above                       | [7]       |
| CrustF2 × HC02198   | GGTTCTTCTCCACCAACCAARGAYAT<br>HGG | See above                       | [7]       |
| ChelF1 × ChelR1     | TACTCTACTAATCATAAAGACATTGG        | CCTCCTCTGAAGGGTCAAAAAATGA       | [8]       |
| ChelF1 × ChelR2     | See above                         | GGATGGCCAAAAATCAAAATAAATG       | [8]       |
| <b>18S</b>          |                                   |                                 |           |
| 18SA × 18SB         | AACCTGGTTGATCCTGCCAGT             | TGATCCTTCCGAGGTTACCTT           | [9]       |
| SSUF04 × SSUR22     | GCTTGTAAGATTAAGCC                 | GCCTGTGCCTTCCTTGGGA             | [10]      |
| NF1f × 18Sr2br      | GGTGGTGCATGGCCGTTCTTAGTT          | TACAAAGGGCAGGGACGTAAT           | [11]      |
| V4F × V4R           | CCAGCASCYCGGTAATTC                | ACTTTCGTTCTTGATYRA              | [12]      |
| V9AF × V9AR         | GTACACACCGCCGTC                   | TGATCCTTCTGCAGGTTACCTAC         | [12]      |
| V9BF × V9BR         | TTGTACACACCGCCC                   | CCTTCYGCAGGTTACCTAC             | [13]      |
| 18S1f × 18Sb2.9r    | TACCTGGTTGATCCTGCCAGTAG           | TATCTGATCGCCTTCGAACCTCT         | [14]      |
| 18S5f × 18S9r       | GCGAAAGCATTTGCCAAGAA              | GATCCTTCCGCAGGTTACCTAC          | [15]      |
| MolF × MolR         | GCCAGTAGCATATGCTTGCTCTC           | AGACTTGCCTCCAATGGATCC           | [16]      |
| 18eF × 18IR         | CTGGTTGATCCTGCCAGT                | GAATTACCGGGCTGCTGGCACC          | [17,18]   |
| 18eF × 18R925D      | See above                         | GATCYAAGAATTTACCTCT             | [17,19]   |
| 18eF × 18rR         | See above                         | GTCCCCTCCGTC AATTYCTTTAAG       | [17,20]   |
| 18F509 × 18rR       | CCCCGTAATTGGAATGAGTACA            | See above                       | [20,21]   |
| 18F509 × 18R925D    | See above                         | See above                       | [19,21]   |
| 18F509 × 18R1779    | See above                         | TGTTACGACTTTTACTTCTCTA          | [21]      |
| #1F × #2_RC         | CTGGTGCCAGCAGCCGGGYAA             | TCCGTCAATTYCTTTAAGTT            | [22]      |
| #1F × #3_RC         | See above                         | AACYAMSAACGGCCATGCACCRC         | [22]      |
| #1F × #4_RC         | See above                         | CKRAGGGCATYACWGACCTGTTAT        | [22]      |
| #1F × #5_RC         | See above                         | GTGTGYACAAAGBCAGGGAC            | [22]      |
| #2F × #3_RC         | AACTTAAAGRAATTGACGGA              | See above                       | [22]      |
| #2F × #4_RC         | See above                         | See above                       | [22]      |
| #2F × #5_RC         | See above                         | See above                       | [22]      |
| #3F × #5_RC         | GYGGTGCATGGCCGTTSKTRGTT           | See above                       | [22]      |
| #4F × #5_RC         | ATAACAGGTCWGTRATGCCTYMG           | See above                       | [22]      |

## References

1. Folmer O, Black M, Hoeh W, Lutz R, Vrijenhoek R (1994) DNA primers for amplification of mitochondrial cytochrome c oxidase subunit I from diverse metazoan invertebrates. *Molecular Marine Biology and Biotechnology* 3: 294-299.
2. Meyer CP (2003) Molecular systematics of cowries (Gastropoda: Cypraeidae) and diversification patterns in the tropics. *Biological Journal of the Linnean Society* 79: 60.
3. Geller J, Meyer C, Parker M, Hawk H (2013) Redesign of PCR primers for mitochondrial cytochrome c oxidase subunit I for marine invertebrates and application in all-taxa biotic surveys. *Mol Ecol Resour* 13: 851-861.
4. Leray M, Yang YJ, Meyer PC, Mills CS, Agudelo N, et al. (2013) A new versatile primer set targeting a short fragment of the mitochondrial COI region for metabarcoding metazoan diversity: application for characterizing coral reef fish gut contents. *Front Zool* 10.
5. Meusnier I, Singer G, Landry J, Hickey D, Hebert P, et al. (2008) A universal DNA mini-barcode for biodiversity analysis. *Bmc Genomics* 9.
6. Radulovici AE, Sainte-Marie B, Dufresne F (2009) DNA barcoding of marine crustaceans from the estuary and gulf of st lawrence: A regional-scale approach. *Molecular ecology resources* 9: 181-187.
7. Costa FO, deWaard JR, Boutillier J, Ratnasingham S, Dooh RT, et al. (2007) Biological identifications through DNA barcodes: the case of the Crustacea. *Canadian Journal of Fisheries and Aquatic Sciences* 64: 272-295.
8. Barrett RDH, Hebert PDN (2005) Identifying spiders through DNA barcodes. *Canadian Journal of Zoology* 83: 481-491.
9. Apakupakul K, Siddall ME, Burreson EM (1998) Higher Level Relationships of Leeches (Annelida: Clitellata: Euhirudinea) Based on Morphology and Gene Sequences. *Molecular Phylogenetics and Evolution* 12: 10.
10. Blaxter ML, De Ley P, Garey JR (1998) A molecular evolutionary framework for the phylum Nematoda. *Nature* 392.
11. Porazinska DL, Giblin-Davis RM, Faller L, Farmerie W, Kanzaki N, et al. (2009) Evaluating high-throughput sequencing as a method for metagenomic analysis of nematode diversity. *Mol Ecol Resour* 9: 1439-1450.
12. Guillou L, Bachar D, Audic S, Bass D, Berney C, et al. (2012) The Protist Ribosomal Reference database (PR2): a catalog of unicellular eukaryote small sub-unit rRNA sequences with curated taxonomy. *Nucleic Acids Res* 41: D597-604.
13. Amaral-Zettl LA, McCliment EA, Ducklow HW, Huse SM (2009) A Method for Studying Protistan Diversity Using Massively Parallel Sequencing of V9 Hypervariable Regions of Small-Subunit Ribosomal RNA Genes. *PLoS ONE*.
14. Whiting MF (2002) Mecoptera is paraphyletic: multiple genes and phylogeny of Mecoptera and Siphonaptera. *Zoologica Scripta* 31.
15. Carranza S, Giribet G, Ribera C, Bagaña J, Riutort M (1996) Evidence that two types of 18S rDNA coexist in the genome of *Dugesia* (Schmidtea) mediterranea (Platyhelminthes, Turbellaria, Tricladida). *Molecular Biology and Evolution* 13.
16. Holland PWH, Hacker AM, Williams NA (1991) A molecular analysis of the phylogenetic affinities of *Saccoglossus cambrensis* brambell & cole (hemichordata). *Phil Trans R Soc Land B* 332: 185-189.
17. Hillis DM, Dixon MT (1991) Ribosomal DNA: Molecular evolution and phylogenetic inference. *Quarterly Review of Biology* 66:411.
18. Halanych K, Bacheller J, Aguinaldo A, Liva S, Hilli D, et al. (1995) Evidence from 18S ribosomal DNA that the lophophorates are protostome animals. *Science* 3.
19. Burnette A, Struck TH, Halanych KM (2005) Holopelagic *Poeobius meseres* (Poeobiidae, Annelida) is derived from within benthic Flabelligerid worms. *Biological Bulletin* 20: 208:213.
20. Passamanek YJ, Schander C, Halanych KM (2004) Investigation of molluscan phylogeny using large-subunit and small-subunit nuclear rRNA sequences. *Molecular Phylogenetics and Evolution* 38: 32:25.
21. Struck TH, Purschke G, Halanych KM (2005) A scaleless scale worm: Molecular evidence for the phylogenetic placement of *Pisione remota* (Pisionidae, Annelida). *Marine Biology Research* 1: 243-253.
22. Machida JR, Knowlton N (2012) PCR Primers for Metazoan Nuclear 18S and 28S Ribosomal DNA Sequences. *PLoS ONE* 7.
